# Supplementary material
Source: PubMed Central journal article supplement (PMC3675907)
Supplement: NIHMS477526-supplement-Supple.pdf [file NIHMS477526-supplement-Supple.pdf]

## SUPPLEMENTARY MATERIALS

**Table S1. Prevalence of *cnf1*, *hek*, and *hlyA* among lower urinary tract UPEC and the ECOR set by multiplex PCR.**

| Gene            | UPEC (n=163)<br>Prevalence (%) | ECOR (n=72)<br>Prevalence (%) | Significance<br>(Fisher's Exact) |
|-----------------|--------------------------------|-------------------------------|----------------------------------|
| <i>cnf1</i>     | 75 (46)                        | 6 (8.3)                       | $P < 0.0001$                     |
| <i>hek</i>      | 78 (47.9)                      | 12 (16.7)                     | $P < 0.0001$                     |
| <i>hlyA</i>     | 72 (44.2)                      | 10 (13.9)                     | $P < 0.0001$                     |
| All three genes | 70 (42.9)                      | 6 (8.3)                       | $P < 0.0001$                     |

**Table S2. Leucine codon usage for *fim* recombinases and *fim* operon genes of UPEC strain UTI89**

| Genes       | Leucine Codon Count (% of Total Leucines) |            |            |            |                |            | Total<br>Leucines |
|-------------|-------------------------------------------|------------|------------|------------|----------------|------------|-------------------|
|             | <u>CUC</u>                                | <u>CUG</u> | <u>CUA</u> | <u>CUU</u> | <u>UUG</u>     | <u>UUA</u> |                   |
| <i>fimB</i> | 1 (4.5)                                   | 3 (13)     | 1 (4.5)    | 6 (27)     | <b>5 (23)</b>  | 6 (27)     | 22                |
| <i>fimX</i> | 3 (13)                                    | 4 (17)     | 1 (4.3)    | 8 (35)     | <b>2 (9)</b>   | 5 (22)     | 23                |
| <i>fimE</i> | 2 (11)                                    | 5 (28)     | 0 (0)      | 6 (33)     | <b>1 (5.6)</b> | 4 (22)     | 18                |
| <i>fimA</i> | 0 (0)                                     | 11 (65)    | 1 (5.9)    | 0 (0)      | <b>2 (12)</b>  | 3 (18)     | 17                |
| <i>fimI</i> | 1 (5.6)                                   | 6 (33)     | 3 (17)     | 2 (11)     | <b>2 (11)</b>  | 4 (22)     | 18                |
| <i>fimC</i> | 1 (3.8)                                   | 7 (27)     | 1 (3.8)    | 4 (15)     | <b>8 (31)</b>  | 5 (19)     | 26                |
| <i>fimD</i> | 16 (19)                                   | 25 (30)    | 3 (3.6)    | 8 (9.5)    | <b>10 (12)</b> | 22 (26)    | 84                |
| <i>fimF</i> | 0 (0)                                     | 7 (28)     | 7 (28)     | 7 (28)     | <b>4 (16)</b>  | 0 (0)      | 25                |
| <i>fimG</i> | 2 (14)                                    | 0 (0)      | 1 (7.1)    | 3 (21)     | <b>5 (36)</b>  | 3 (21)     | 14                |
| <i>fimH</i> | 1 (4.5)                                   | 8 (35)     | 0 (0)      | 5 (23)     | <b>3 (14)</b>  | 5 (23)     | 22                |

**Table S3. Bacterial Strains and Plasmids.**

| Strain            | Genotype                                                                                                                                               | Reference             |
|-------------------|--------------------------------------------------------------------------------------------------------------------------------------------------------|-----------------------|
| UTI89             | <i>Wt</i>                                                                                                                                              | (Mulvey et al., 2001) |
| GGA1              | Spontaneous PAI II <sub>UTI89</sub> deletion mutant: UTI89 <i>leuX</i> PAI II <sub>UTI89</sub> <sup>-</sup> , initial <i>fimS</i> orientation phase ON | This study            |
| TJH1              | Spontaneous PAI II <sub>UTI89</sub> deletion mutant: UTI89 <i>leuX</i> PAI II <sub>UTI89</sub> <sup>-</sup> , phase OFF                                | This study            |
| TJH1 Comp         | Restoration of <i>wt leuX</i> at native locus in TJH1: UTI89 <i>leuX</i> <sup>+</sup> , PAI II <sub>UTI89</sub> <sup>-</sup> , phase OFF               | This study            |
| TJH1Δ <i>fimB</i> | Complete deletion of <i>fimB</i> in TJH1, phase OFF                                                                                                    | This study            |
| TJH1Δ <i>fimX</i> | Complete deletion of <i>fimX</i> in TJH1, phase OFF                                                                                                    | This study            |

|                                                |                                                                                                            |                       |
|------------------------------------------------|------------------------------------------------------------------------------------------------------------|-----------------------|
| TJH1 $\Delta$ <i>fimXB</i>                     | Complete deletion of <i>fimB</i> in TJH1 $\Delta$ <i>fimX</i> , phase OFF                                  | This study            |
| TJH2                                           | UTI89 $\Delta$ PAI II <sub>UTI89</sub> : <i>leuX</i> <sup>+</sup> , PAI II <sub>UTI89</sub> <sup>-</sup>   | This study            |
| UTI89 $\Delta$ <i>leuX</i>                     | Complete deletion of <i>leuX</i> , PAI II <sub>UTI89</sub> <sup>+</sup> , phase OFF                        | This study            |
| UTI89 <i>leuX</i> $\Delta$ G <sub>80</sub>     | 1 nt deletion in <i>leuX</i> : <i>leuX</i> <sup>-</sup> , PAI II <sub>UTI89</sub> <sup>+</sup> , phase OFF | This study            |
| UTI89 <i>leuX</i> $\Delta$ GC <sub>80-81</sub> | 2 nt deletion in <i>leuX</i> : <i>leuX</i> <sup>-</sup> , PAI II <sub>UTI89</sub> <sup>+</sup> , phase OFF | This study            |
| UTI89 <sub>OFF</sub> $\Delta$ <i>fimBE</i>     | $\Delta$ <i>fimB</i> $\Delta$ <i>fimE</i> ; phase OFF                                                      | This study            |
| UTI89 <sub>ON</sub> $\Delta$ <i>fimBE</i>      | $\Delta$ <i>fimB</i> $\Delta$ <i>fimE</i> ; phase ON                                                       | This study            |
| UTI89 $\Delta$ <i>fimB</i>                     | $\Delta$ <i>fimB</i> , phase OFF                                                                           | This study            |
| UTI89 $\Delta$ <i>fimX</i>                     | $\Delta$ <i>fimX</i> , phase OFF                                                                           | This study            |
| UTI89 <i>att</i> <sub>λ</sub> :PSSH10-1        | <i>spc</i> <sup>R</sup>                                                                                    | (Wright et al., 2005) |
| <b>Plasmids</b>                                | <b>Relevant Genes-Sequences</b>                                                                            | <b>Reference</b>      |
| pBAD33                                         | <i>araC</i> , P <sub>ara</sub> : Cm <sup>R</sup>                                                           |                       |
| pTRC99a                                        | <i>lacIq</i> ; P <sub>lac</sub> : Amp <sup>R</sup>                                                         |                       |
| pBAD- <i>fimX</i>                              | <i>araC</i> ; P <sub>ara</sub> -6xHN- <i>fimX</i> in pBAD33                                                | This study            |
| pTRC- <i>fimB</i>                              | <i>lacIq</i> ; P <sub>lac</sub> -HAT- <i>fimB</i> in pTRC-99a                                              | This study            |
| pCR-BLUNT                                      | Kan <sup>R</sup>                                                                                           | Invitrogen            |
| p <i>fimB-E</i>                                | <i>fimB</i> , <i>fimE</i> in pCR-BLUNT                                                                     | This study            |
| pCR- <i>fimX</i>                               | <i>fimX</i> in pCR-BLUNT with -1170 of 5' UTR                                                              | This study            |
| pBAD- <i>leuX</i>                              | <i>leuX</i> in pBAD33 with -144 of 5' UTR                                                                  | This study            |

**Table S4: Primer Sequences**

| Primer                                            | Sequence                                                                                      | Reference  |
|---------------------------------------------------|-----------------------------------------------------------------------------------------------|------------|
| $\Delta$ <i>leuX</i> KO #1                        | GGTGGCGTGCGACAGGTATAATCCACAACGTTTTCCGCAT<br>ACCTCTTCAGGTGTAGGCTGGAGCTGCTTC                    | This study |
| $\Delta$ <i>leuX</i> G <sub>80</sub> KO<br>KD4 #1 | TGATTCAAAATCAACCGTAGAAATACGTGCCGGTTCGAGT<br>CCGGCCTTCGCACCAAAAGTGTGTAGGCTGGAGCTGCTTC          | This study |
| <i>leuX</i> G <sub>80</sub> KO<br>KD4 #2          | AGGTAGATAAATACTGAATTTTAGGCATAAAAAAAGACCT<br>CAGTTGAGGTCTATTTACATATGGGAATTAGCCATGGTCC          | This study |
| <i>leuX</i> GC <sub>80-81</sub> KO<br>KD4 #1      | TGATTCAAAATCAACCGTAGAAATACGTGCCGGTTCGAGT<br>CCGGCCTTCG ACCAAAAGTGTGTAGGCTGGAGCTGCTTC          | This study |
| TJH1 COMP #1                                      | CAGTTGATTCAAAATCAACCGTAGAAATACGTGCCGGTTC<br>GAGTCCGGCCTTCGGCACCACACCGGTGTAGGCTGGAGCT<br>GCTTC | This study |
| TJH1 COMP #2                                      | GCACGGATATGGGTGATTTTCAGACACAAAAAAGCCGCTC<br>TTGAGCGACTCGATTTGCATAATGGGAATTAGCCATGGTC<br>C     | This study |
| <i>fimBE</i> KO #1                                | GGCAGGAATAATCGCTAGGGACCTAAGCATTAGCATGATA<br>ATAGCGTGTAGGCTGGAGCTGCTTC                         | This study |
| <i>fimBE</i> KO #2                                | GTCTTGATTTTATTTGTTTTTTAACTTTATTATCAATTAGTT<br>AAAATGGGAATTAGCCATGGTCC                         | This study |

|                                    |                                                                          |            |
|------------------------------------|--------------------------------------------------------------------------|------------|
| fimB KO #2                         | TATCGTAAGAATAATGTAGTTTTTAACACCCATCCCTGGTATCTCAACTATCATGGGAATTAGCCATGGTCC | This study |
| fimX KO #1                         | GATAATGAGATTACATCGATAACGTTCTGATTGCAGGCATACTTATCTGGGTGTAGGCTGGAGCTGCTTC   | This study |
| fimX KO #2,                        | CGAGCAGCATTACTGGCTGTGTATCTGACAGTATGCTGAA TATTTTCGATGATGGGAATTAGCCATGGTCC | This study |
| PHASE 1                            | CCGTAACGCAGACTCATCCTC                                                    | This study |
| PHASE 2                            | GACAGAACAACAATTGCCAG                                                     | This study |
| fim #14                            | TGCTATCGATTCCAGGAAATACACAGTCTG                                           | This study |
| fimX FLANK #1                      | TAACGACCAAAAAAGTAAAGAACACCTTGC                                           | This study |
| fimX FLANK #2                      | GTAGGAATCTGACATTTTGAATCAGAAGGTA CTG                                      | This study |
| fimX PCR/PROBE #1                  | ACA ACTGTACACGGTGGCGTATGAC                                               | This study |
| fimX PCR/PROBE #2                  | ACAGGCATGACGTAACATATGAGGA                                                | This study |
| PAI II <sub>UTI89</sub> ko F       | TTAACTCTCTCAAGGTCAACTGATATCAACGTACATCTACC AACACATGTATTCCGGGGATCCGTCGACC  | This study |
| PAI II <sub>UTI89</sub> ko R       | TTAACTCTCTCAAGGTCAACTGATATCAACGTACATCTACC AACACATGTATTCCGGGGATCCGTCGACC  | This study |
| PAI II <sub>UTI89</sub> 5' FLANK F | TCCACAACGTTTTTCCGCATA                                                    | This study |
| PAI II <sub>UTI89</sub> 5' INT R   | GCGTATTCCCTCCCTGTTGG                                                     | This study |
| PAI II <sub>UTI89</sub> 3' FLANK R | CGGATATGGGTGATTTTCAGACA                                                  | This study |
| 16s RT L                           | CAGCCACACTGGAACTGAGA                                                     | This study |
| 16s RT R                           | GTTAGCCGGTGCTTCTTCTG                                                     | This study |
| leuX RT L                          | GCCGAAGTGCGGAAATCGGTAGACGCA                                              | This study |
| leuX RT R                          | GGCCGGACTCGAACC GG CACGTA                                                | This study |
| cdiA 4661F                         | GCTATGCCACAGGCTCTCTGGA                                                   | This study |
| cdiA 5298R                         | CCCGAGGCGGTCAAGAAAATA                                                    | This study |
| hek 117F                           | AGCCGGTGCCTCTGTGATGT                                                     | This study |
| hek 584R                           | CCAAGGCTCCATGCGAAGTT                                                     | This study |
| cnf1 1541F                         | TTCTCTGGACTCGAGGTGGTGG                                                   | This study |
| cnf1 1847R                         | CCCCAGCCGTATGATAAGAGG                                                    | This study |
| hlyA 114F                          | AGCAGAGCAAACCCGCAATG                                                     | This study |
| hlyA 314R                          | CGTTCGGTGAGGCCAATGAGT                                                    | This study |

## References

- Mulvey, M.A., Schilling, J.D. and Hultgren, S.J. (2001) Establishment of a persistent *Escherichia coli* reservoir during the acute phase of a bladder infection. *Infect Immun*, **69**, 4572-4579.
- Wright, K.J., Seed, P.C. and Hultgren, S.J. (2005) Uropathogenic *Escherichia coli* Flagella Aid in Efficient Urinary Tract Colonization. *Infect Immun*, **73**, 7657-7668.
